# Supplementary material
Source: Springer Nature journal article supplement (https://www.springermedizin.de/resource/supplementary/12885_2009_1611_MOESM4_ESM.pdf/9472462)
Supplement: MOESM4 [file 9472462]

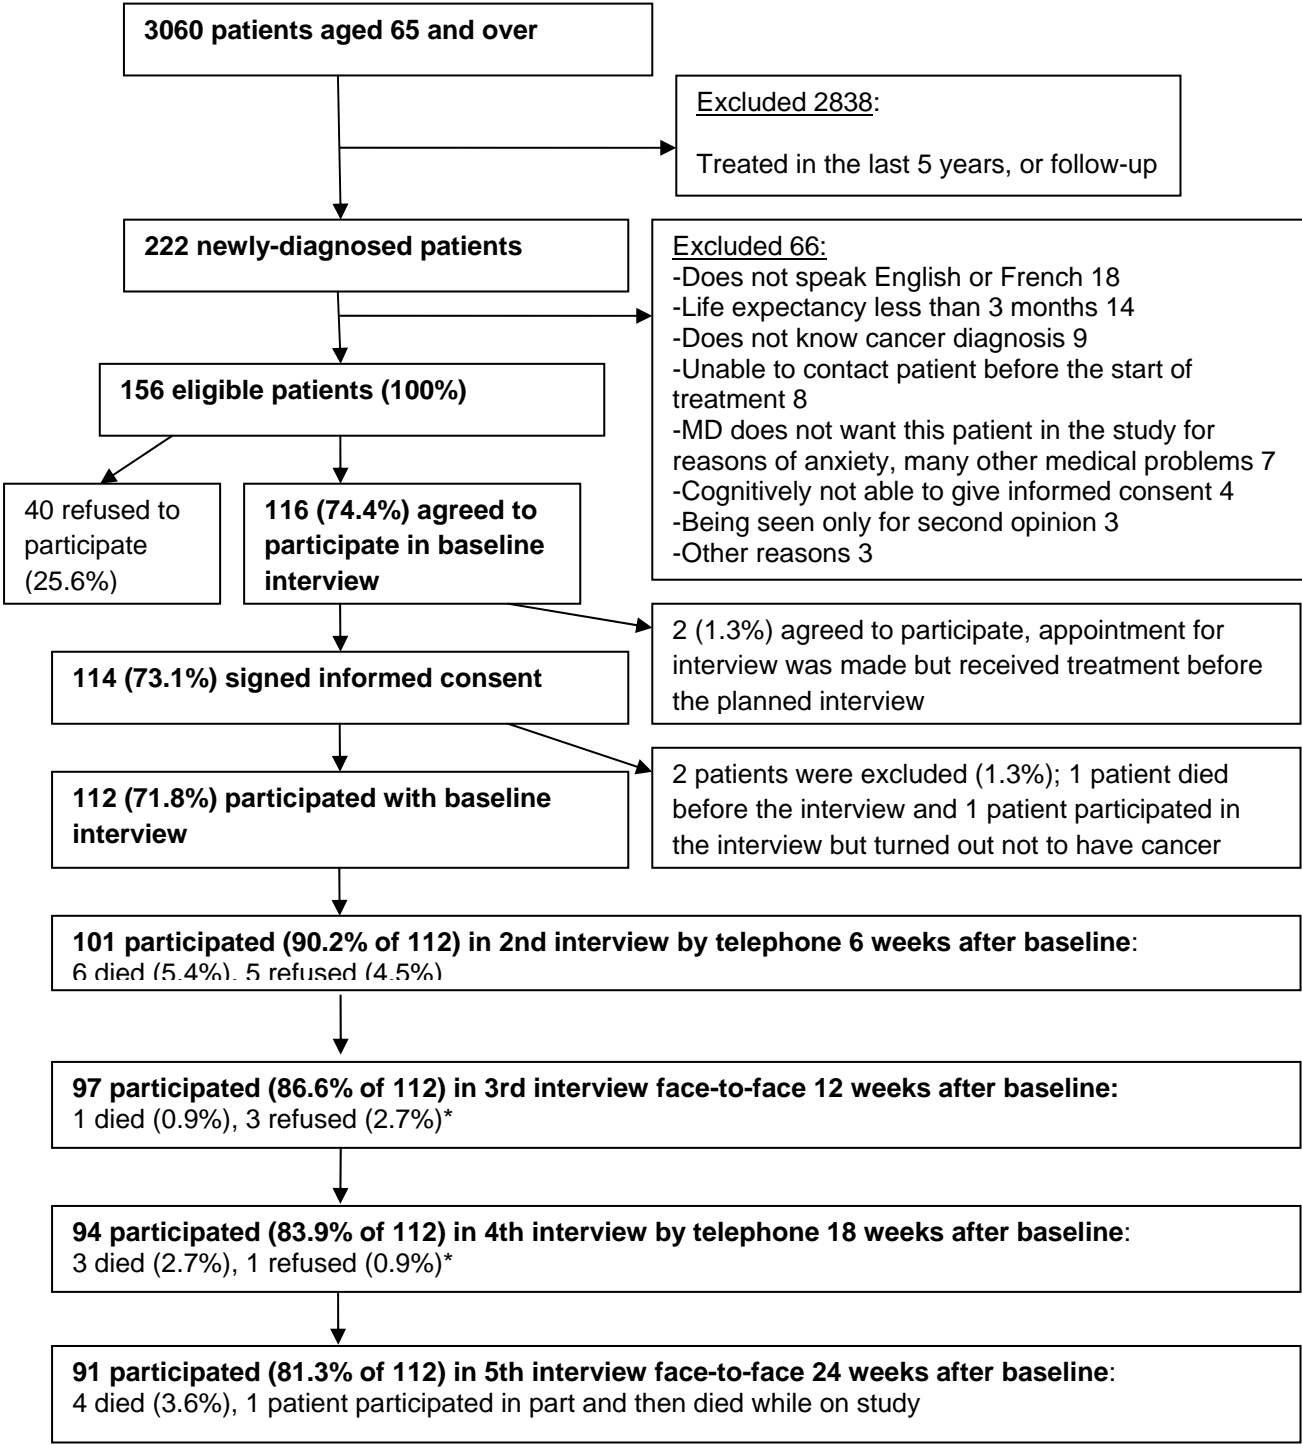

\*=one person refused to participate in third and fourth interview but did participate in interview 5.
